# Supplementary material for: Stacking of a low-lignin trait with an increased guaiacyl and 5-hydroxyguaiacyl unit trait leads to additive and synergistic effects on saccharification efficiency in Arabidopsis thaliana
Source: PubMed Central journal article supplement (PMC6146604; doi:10.1186/s13068-018-1257-y), 2018-09-20

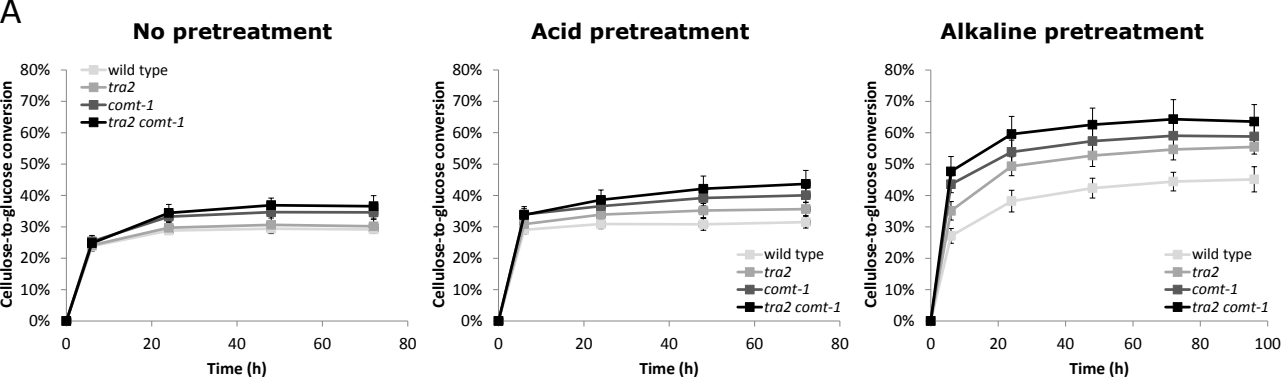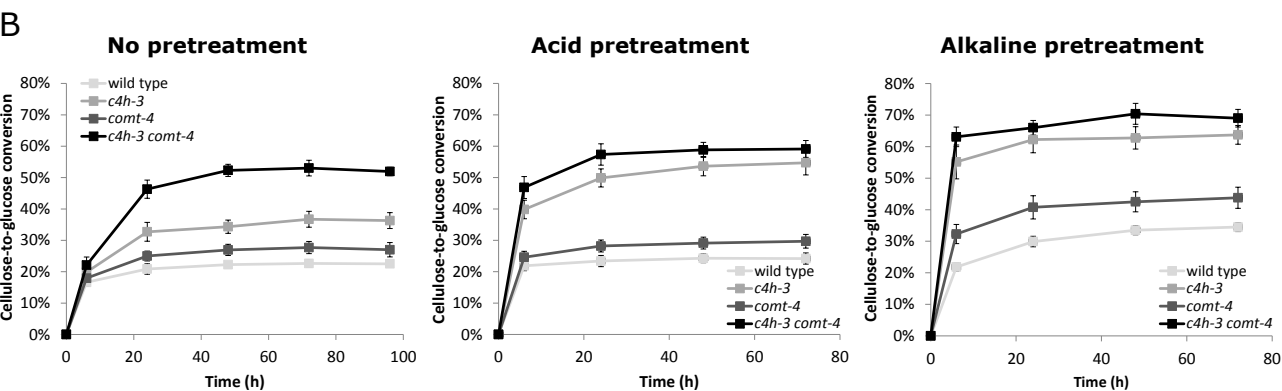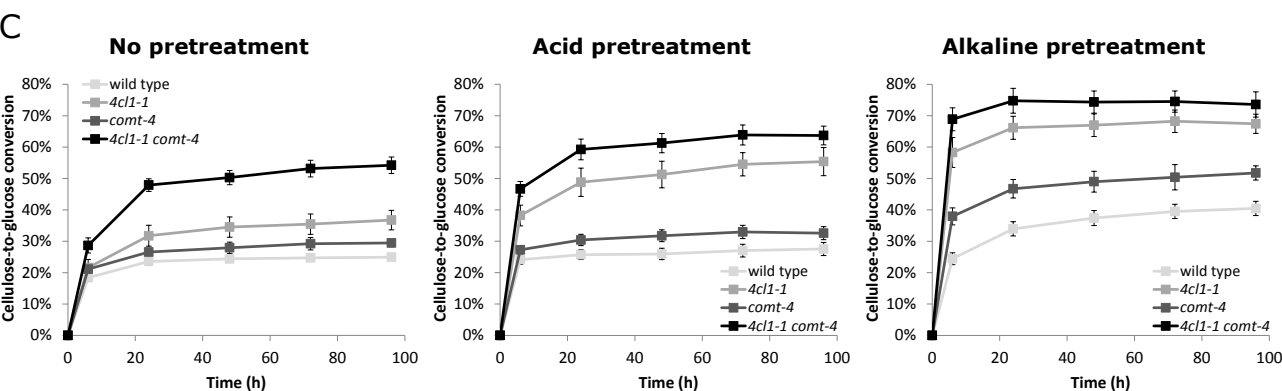

Supplement: 13068_2018_1257_MOESM1_ESM.pdf [file 13068_2018_1257_MOESM1_ESM.pdf]
