# Supplementary material for: Stacking of a low-lignin trait with an increased guaiacyl and 5-hydroxyguaiacyl unit trait leads to additive and synergistic effects on saccharification efficiency in Arabidopsis thaliana
Source: PubMed Central journal article supplement (PMC6146604; doi:10.1186/s13068-018-1257-y), 2018-09-20
Supplement: 13068_2018_1257_MOESM7_ESM.pdf [file 13068_2018_1257_MOESM7_ESM.pdf]

A

No pretreatment  
tra2 comt-4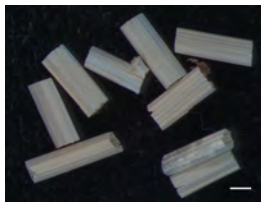

wild type

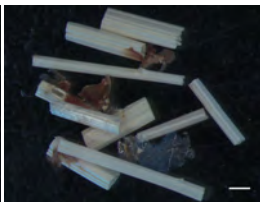

tra2

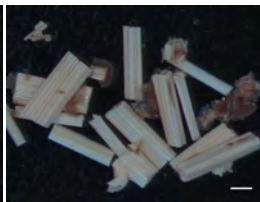

comt-1

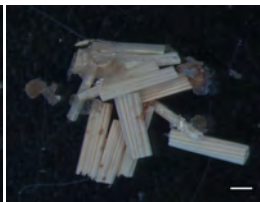

tra2 comt-1

Acid pretreatment  
tra2 comt-4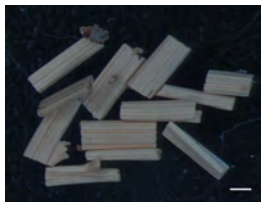

wild type

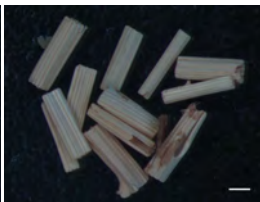

tra2

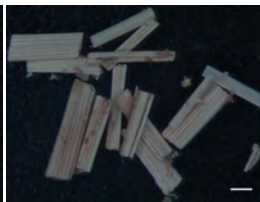

comt-1

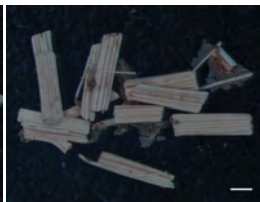

tra2 comt-1

Alkali pretreatment  
tra2 comt-4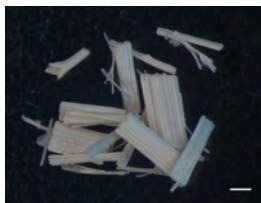

wild type

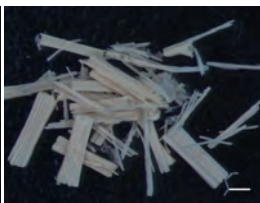

tra2

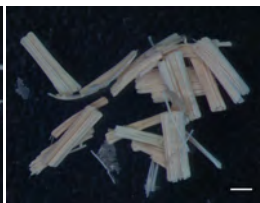

comt-1

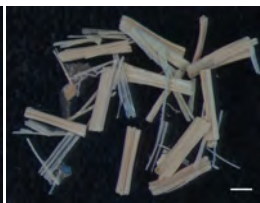

tra2 comt-1

**B**No pretreatment  
c4h-3 comt-4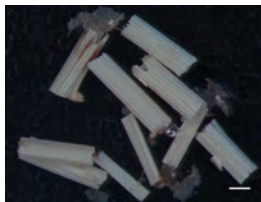

wild type

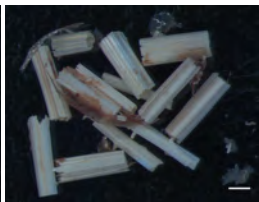

c4h-3

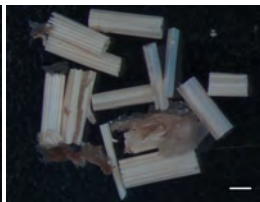

comt-4

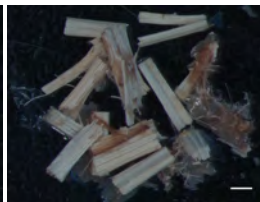

c4h-3 comt-4

Acid pretreatment  
c4h-3 comt-4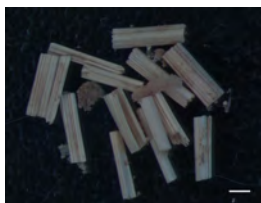

wild type

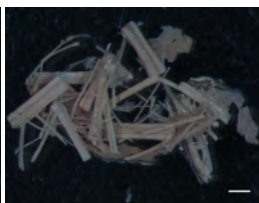

c4h-3

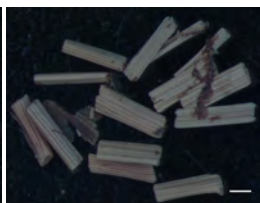

comt-4

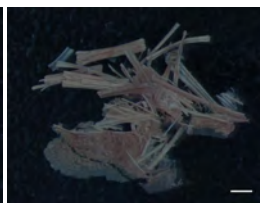

c4h-3 comt-4

Alkali pretreatment  
c4h-3 comt-4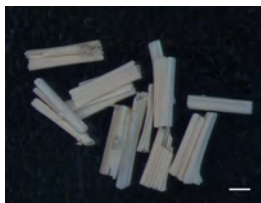

wild type

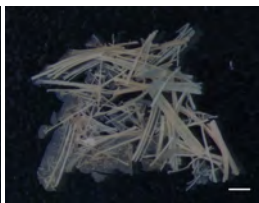

c4h-3

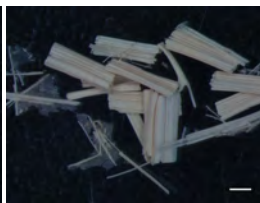

comt-4

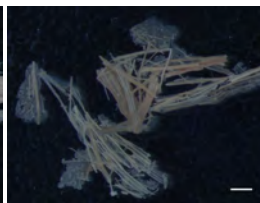

c4h-3 comt-4

C

No pretreatment  
4cl1-1 comt-4

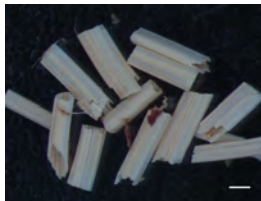

wild type

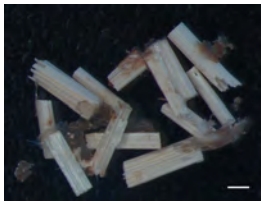

4cl1-1

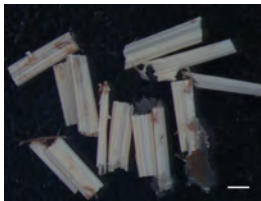

comt-4

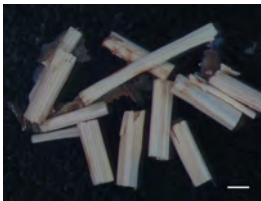

4cl1-1 comt-4

Acid pretreatment  
4cl1-1 comt-4

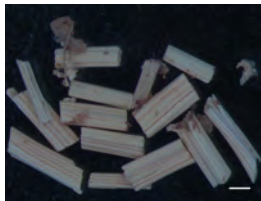

wild type

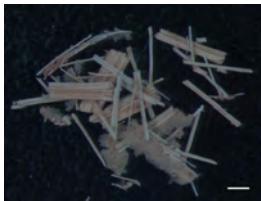

4cl1-1

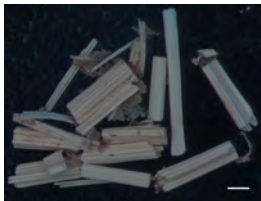

comt-4

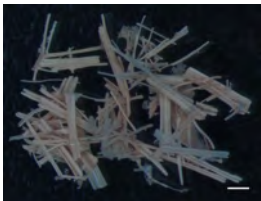

4cl1-1 comt-4

Alkali pretreatment  
4cl1-1 comt-4

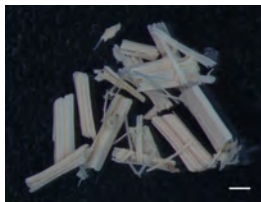

wild type

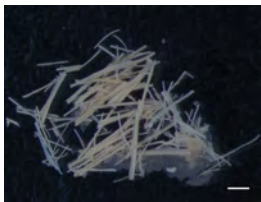

4cl1-1

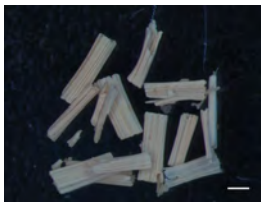

comt-4

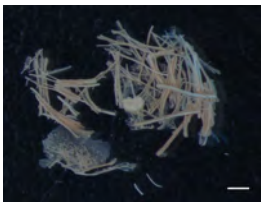

4cl1-1 comt-4
