# Supplementary material for: Stacking of a low-lignin trait with an increased guaiacyl and 5-hydroxyguaiacyl unit trait leads to additive and synergistic effects on saccharification efficiency in Arabidopsis thaliana
Source: Biotechnol Biofuels. 2018 Sep 20;11:257. doi: 10.1186/s13068-018-1257-y (PMC6146604; doi:10.1186/s13068-018-1257-y)
Supplement: Supplementary file 5 — Additional file 5. Values and significances of the released glucose/CWR over time. Released glucose/CWR of the tra2 comt-1, c4h-3 comt-4 and 4cl1-1 comt-4 double mutants, wild type and the corresponding parental lines (n = 10) (± SD), without, with acid and with alkaline pretreatment at the different timepoints. Significance groups are indicated with the same letter in superscript and different letters represent significant differences at the 0.01 significance level (ANOVA, pairwise comparison with Holm correction). [file 13068_2018_1257_MOESM5_ESM.xlsx]

## Sheet: Sheet1
		No pretreatment					Acid pretreatment					Alkaline pretreatment
		6h	24h	48h	72h	96h	6h	24h	48h	72h	96h	6h	24h	48h	72h	96h
tra2 comt-1	wild type	8.9 ± 0.4% (a)	10.7 ± 0.3% (a)	11.0 ± 0.5% (a)	10.9 ± 0.3% (a)		10.8 ± 0.5% (a)	11.5 ± 1.5% (a)	11.5 ± 0.7% (a)	11.7 ± 0.7% (a)		10.1 ± 0.9% (a)	14.2 ± 1.3% (a)	15.8 ± 1.2% (a)	16.6 ± 1.1% (a)	16.8 ± 1.5% (a)
	tra2	9.2 ± 0.4% (a)	11.4 ± 0,6% (a)	11.7 ± 1.1% (a)	11.5 ± 0.9% (a)		11.8 ± 0.9% (a)	13.0 ± 0.7% (b)	13.5 ± 0.9% (b)	13.6 ± 0.8% (b)		13.4 ± 1.1% (b)	18.9 ± 1.2% (b)	20.2 ± 1.3% (b)	20.9 ± 1.3% (b)	21.2 ± 0.9% (b)
	comt-1	9.6 ± 0.5% (a)	12.7 ± 0.9% (b)	13.2 ± 0.7% (b)	13.2 ± 0.8% (b)		12.9 ± 0.7% (b)	13.9 ± 0.7% (c)	14.9 ± 1.0% (c)	14.9 ± 0.8% (c)		16.6 ± 1.0% (c)	20.5 ± 1.5% (b)	21.8 ± 1.5% (b)	22.5 ± 1.8% (b)	22.4 ± 1.5% (b)
	tra2 comt-1	9.6 ± 1.0% (a)	13.3 ± 1.1% (b)	14.3 ± 0.9% (b)	14.1 ± 1.3% (b)		13.1 ± 1.0% (b)	14.9 ± 1.2% (c)	16.3 ± 1.6% (d)	16.9 ± 1.7% (d)		18.4 ± 1.8% (d)	23.1 ± 2.2% (c)	24.2 ± 2.1% (c)	24.9 ± 2.4% (c)	24.6 ± 2.1% (c)
c4h-3 comt-4	wild type	6.2 ± 0.4% (a)	7.7 ± 0.6% (a)	8.3 ± 0.3% (a)	8.4 ± 0,4% (a)	8.4 ± 0.3% (a)	8.1 ± 0.6% (a)	8.7 ± 0.7% (a)	9.0 ± 0.5% (a)	9.0 ± 0.7% (a)		8.1 ± 0.5% (a)	11.1 ± 0.6% (a)	12.4 ± 0.5% (a)	12.8 ± 0.5% (a)
	c4h-3	7.7 ± 0.7% (b)	12.7 ± 1.2% (b)	13.3 ± 0.8% (b)	14.2 ± 1.0% (b)	14.0 ± 1.0% (b)	15.4 ± 1.1% (b)	19.3 ± 1.1% (b)	20.8 ± 1.2% (b)	21.2 ± 1.5 (b)		21.3 ± 2.1% (b)	24.1 ± 1.6% (b)	24.3 ± 1.4% (b)	24.7 ± 1.2% (b)
	comt-4	6.9 ± 0.6% (a,b)	9.5 ± 0.6% (c)	10.3 ± 0.7% (c)	10.6 ± 0.7% (c)	10.3 ± 0.9% (c)	9.4 ± 0.7% (c)	10.8 ± 0.7% (c)	11.1 ± 0.7% (c)	11.3 ± 0.8% (c)		12.3 ± 1.2% (c)	15.6 ± 1.4% (c)	16.2 ± 1.2% (c)	16.7 ± 1.3% (c)
	c4h-3 comt-4	8.8 ± 1.0% (c)	18.5 ± 1.2% (d)	20.9 ± 0.8% (d)	21.2 ± 1.0% (d)	20.8 ± 0.5% (d)	18.7 ± 1.4% (d)	22.9 ± 1.4% (d)	23.5 ± 1.0% (d)	23.6 ± 1.1% (d)		25.2 ± 1.2% (d)	26.4 ± 0.9% (d)	28.1 ± 1.3% (d)	27.6 ± 1.1% (d)
4cl1-1 comt-4	wild type	7.0 ± 0.4% (a)	9.0 ± 0.5% (a)	9.3 ± 0.4% (a)	9.5 ± 0.4% (a)	9.5 ± 0.3% (a)	9.2 ± 0.6% (a)	9.8 ± 0.6% (a)	9.9 ± 0.7% (a)	10.3 ± 0.8% (a)	10.5 ± 0.8% (a)	9.3 ± 0.7% (a)	13.0 ± 0.9% (a)	14.3 ± 0.9% (a)	15.1 ± 0.9% (a)	15.5 ± 0.9% (a)
	4cl1-1	8.5 ± 1.0% (b)	12.5 ± 1.3% (b)	13.5 ± 1.3% (b)	13.9 ± 1.3% (b)	14.4 ± 1.2% (b)	15.0 ± 1.3% (b)	19.1 ± 1.8% (b)	20.1 ± 1.7% (b)	21.4 ± 1.5% (b)	21.7 ± 1.8% (b)	22.9 ± 1.9% (b)	26.0 ± 1.4% (b)	26.3 ± 1.4% (b)	26.8 ± 1.4% (b)	26.5 ± 1.2% (b)
	comt-4	8.3 ± 0.6% (b)	10.4 ± 0.4% (c)	11.0 ± 0.7% (c)	11.5 ± 0.8% (c)	11.6 ± 0.5% (c)	10.7 ± 0.5% (c)	12.0 ± 0.7% (c)	12.5 ± 0.7% (c)	13.3 ± 0.8% (c)	12.8 ± 0.8% (c)	14.9 ± 1.1% (c)	18.4 ± 1.2% (c)	19.3 ± 1.3% (c)	19.8 ± 1.6% (c)	20.3 ± 0.9% (c)
	4cl1-1 comt-4	11.3 ± 0.9% (c)	18.8 ± 0.8% (d)	19.8 ± 0.9% (d)	20.9 ± 1.0% (d)	21.3 ± 1.0% (d)	18.3 ± 0.9% (d)	23.3 ± 1.3% (d)	24.1 ± 1.2% (d)	25.1 ± 1.3% (d)	25.0 ± 1.2% (d)	27.1 ± 1.4% (d)	29.4 ± 1.6% (d)	29.2 ± 1.4% (d)	29.3 ± 1.3% (d)	28.9 ± 1.6% (d)
